# Supplementary material
Source: MDPI journal article supplement (https://www.mdpi.com/2073-4468/10/2/18)
Supplement: s1 [file s1]

## Supplementary Information

### Recombinant antibody production using a dual-promoter single plasmid system

Stefania C. Carrara<sup>+</sup>, David Fiebig<sup>+</sup>, Jan P. Bogen<sup>+</sup>, Julius Grzeschik, Björn Hock, and Harald Kolmar

**Table S1: Primers used for cloning of bidirectional constructs**

|                              |                                                                         |
|------------------------------|-------------------------------------------------------------------------|
| AvelumabVH_SapI_for          | AAAAAGCTCTTCAAGTGAAGTTCAGCTGTTGG                                        |
| AvelumabVH_SapI_rev          | TTTTTTGCTCTTCTGGCAGAGGAGACAGTAACAAGAG                                   |
| AvelumabVL_SapI_for          | AAAAAGCTCTTCAAGTCAATCCGCCTTGACTC                                        |
| AvelumabVL_SapI_rev          | TTTTTTTGTCTTTCACCCGAGAACTGTGACCTTTG                                     |
| DurvalumabVH_SapI_for        | AAAAAGCTCTTCAAGTGAGGTTCAACTTGTTGAAAGCGG                                 |
| DurvalumabVH_SapI_rev        | TTTTTTGCTCTTCTGGCGCTTGAGACTGTAACGAGGG                                   |
| DurvalumabVL_SapI_for        | AAAAAGCTCTTCAAGTGAAATAGTGCTTACCCAAAGTCC                                 |
| DurvalumabVL_SapI_rev        | TTTTTTGCTCTTCATCGTTTAATTTGACCTTAGTAC                                    |
| MD-Leader-VH_BbsI_for        | ATATAGAAGACATCGCTTGCCACCATGAC                                           |
| CH1_MD_Esp3I_rev             | ATATATCGTCTCGGTATGGGTCTTGTCGCAGCTCTTGG                                  |
| MD-Leader-VL_BbsI_for        | ATATAGAAGACCGTCGCAGCCACCATGAC                                           |
| Lam-CL_Esp3I_rev             | ATATACGTCTCGAGATCTATTAGCTGCACTCGGTGGGGGCCACGGTTTT<br>CTCCACGGTGCTGCCCTC |
| Kap-CL_Esp3I_rev             | ATATACGTCTCGAGATCTATTAACACTCTCCCCTGTTGAAGCTC                            |
| eCMV-HC_BbsI_rev             | GCGCGGAAGACATAGCGCGCTAGAGATCCGTTTAACTTGG                                |
| eCMV-LC_BbsI_rev             | GCGCGGAAGACATGCGACGCTAGAGATCCGTTTAACTTGG                                |
| eCMV_LC-Stuffer-Con_BbsI_for | GCGCGGAAGACATGATGGTACATTTATATTGGCTCATGTCCAATATGAC<br>CGC                |
| eCMV_HC-Stuffer-Con_BbsI_for | GCGCGGAAGACATGGCTGTACATTTATATTGGCTCATGTCCAATATGAC<br>CGC                |
| CMV-HC_BbsI_rev              | GCGCGGAAGACATAGCGGATCTGACGGTTCATAAACCAG                                 |
| CMV-HC-Stuffer-Con_BbsI_for  | GCGCGGAAGACATGGCTCCGCGTTACATAACTTACGGTAAATG                             |
| CMV-LC-BbsI_rev              | GCGCGGAAGACATGCGAGATCTGACGGTTCATAAACCAGC                                |
| CMV-LC-Stuffer-Con_BbsI_for  | GCGCGGAAGACATGATGCCGCGTTACATAACTTACGGTAAATG                             |
| EF1a-LC-Stuffer-Con_BbsI_for | GCGCGGAAGACATGATGGGC                                                    |
| EF1a-LC_BbsI_rev             | ATATAGAAGACATGCGAAGCCTGCTTTTTTGTACAACTTGTCAC                            |
| HC-minCMV-CMV-LC_BbsI_rev    | GCGCGGAAGACTAAGCGTCTGACGGTTCATAACGAGCTCTGC                              |
| HC-minCMV-CMV-LC_BbsI_for    | GCGCGGAAGACATGCGAGATCTGACGGTTCATAAACCAGC                                |

**Table S2: RT-qPCR primers for HC and LC constant regions**

|                        |                      |
|------------------------|----------------------|
| HC constant_fwd        | TTCCAGAACCAGTCACCGTT |
| HC constant_rev        | CCAAAGAAGAAGAGGGAACA |
| LC kappa constant_fwd  | TGTAGGTGCTGTCCTTGCTG |
| LC kappa constant_rev  | CTGTTGTGTGCCTGCTGAAT |
| LC lambda constant_fwd | GTAGCTCCTGTGGCTTTTC  |
| LC lambda constant_rev | TGATCAGCGACTTCTACCC  |

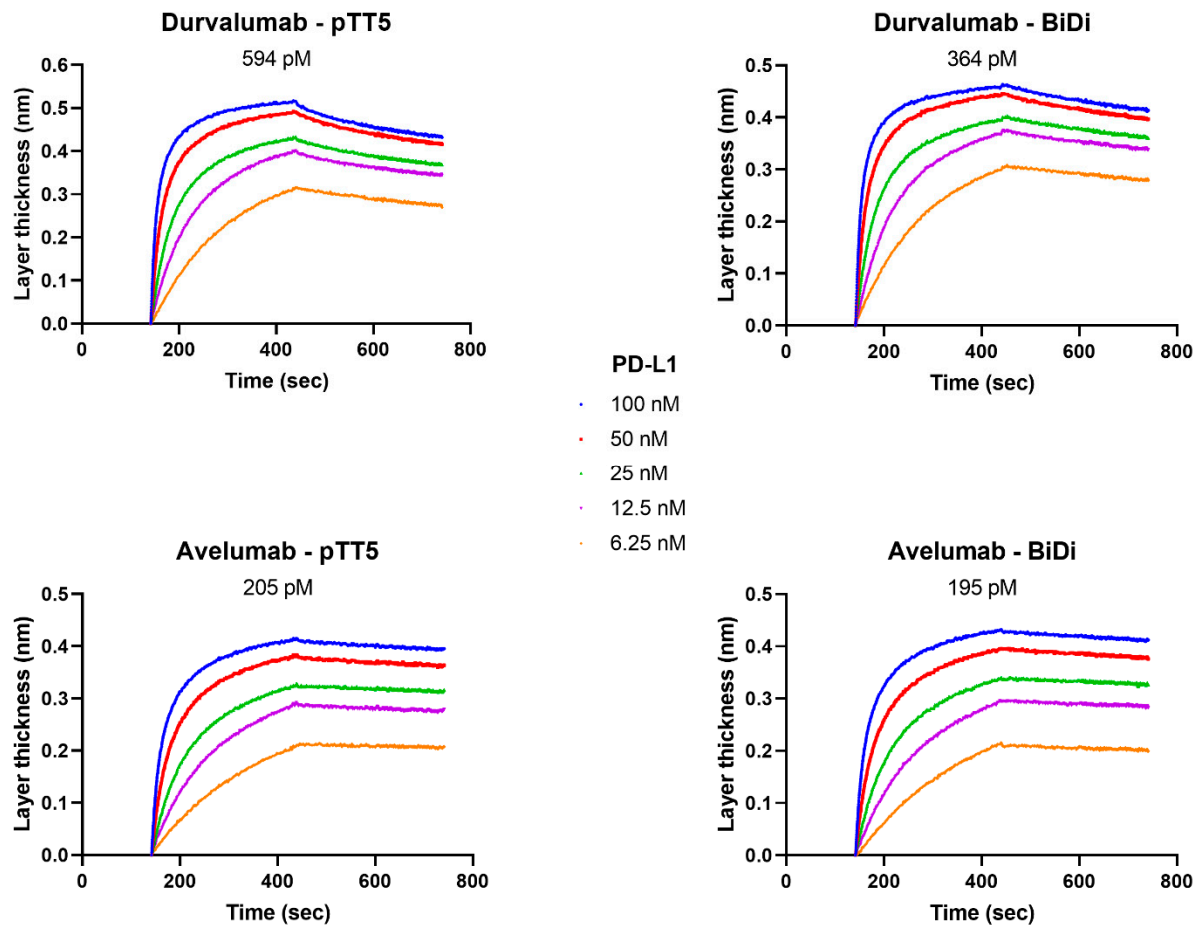

**Figure S1: Affinity determination by BLI of antibodies produced in Expi293-F.** Binding of Durvalumab and Avelumab produced in Expi293-F cells to PD-L1. Antibodies were either produced by co-transfection (denoted as pTT5) or transfection using 2xeCMV BiDi construct (denoted as BiDi). The curves represent binding of 10 µg/mL antibody to different concentrations of PD-L1.

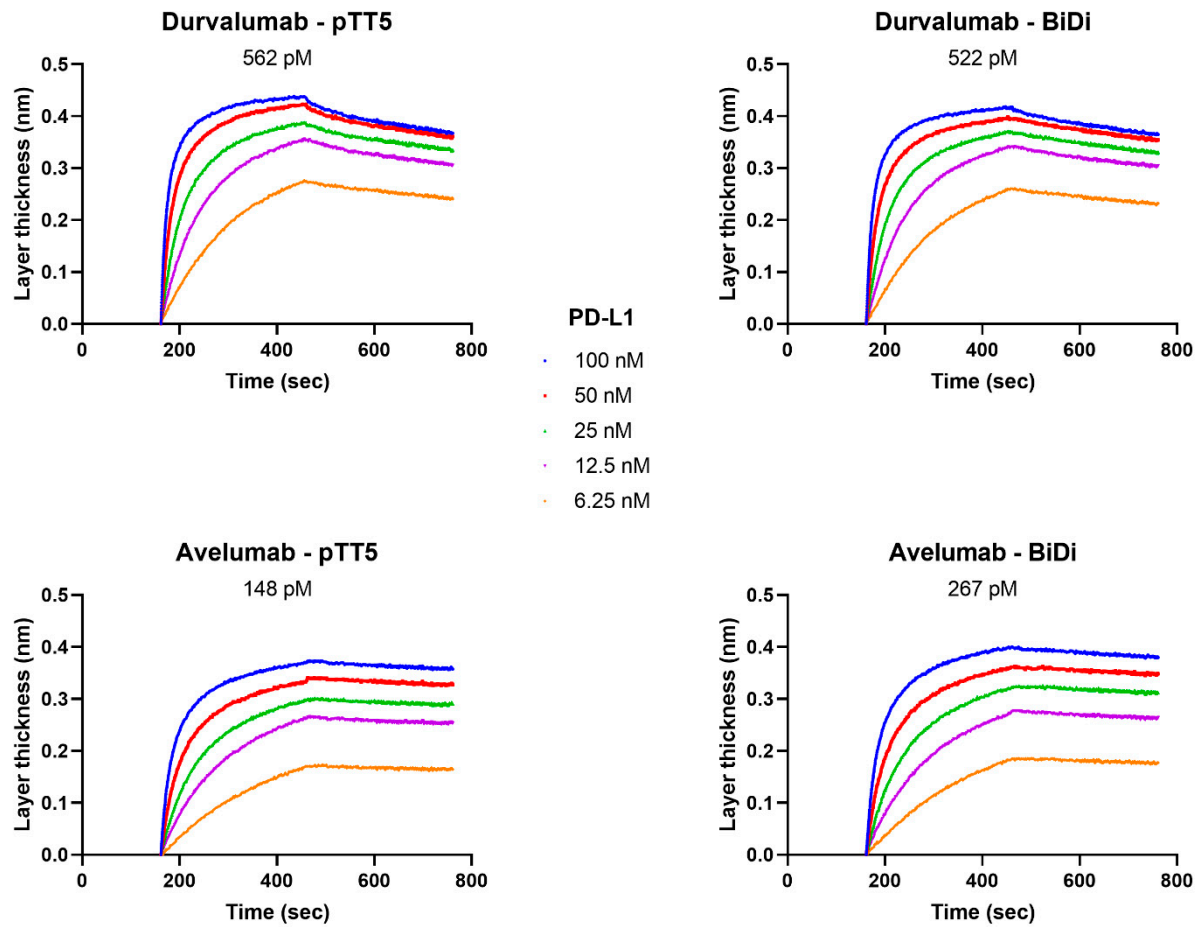

**Figure S2: Affinity determination by BLI of antibodies produced in ExpiCHO-S.** Binding of Durvalumab and Avelumab produced in ExpiCHO-s cells to PD-L1. Antibodies were either produced by co-transfection (denoted as pTT5) or transfection using 2xeCMV BiDi construct (denoted as BiDi). The curves represent binding of 10  $\mu\text{g/mL}$  antibody to different concentrations of PD-L1.

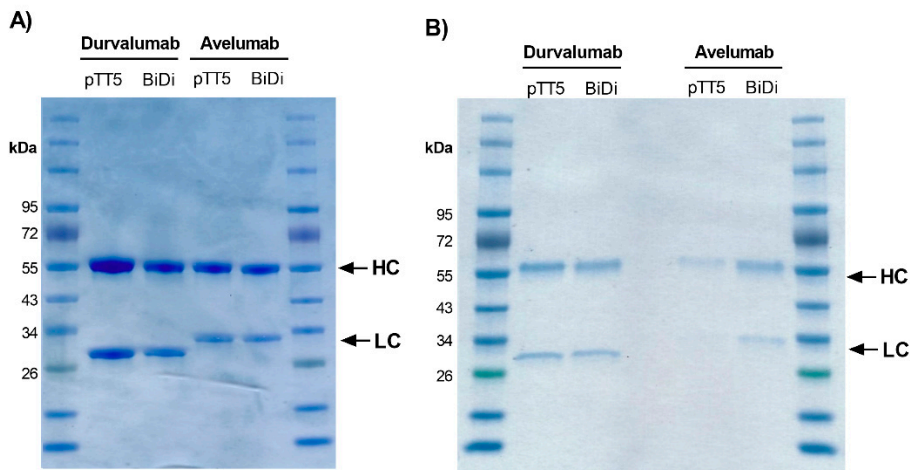

**Figure S3: SDS-PAGE analysis of purified antibodies.** Heavy and light chain bands at their expected molecular weights. A) represents purified antibodies from an Expi293-F production, while B) represents those produced in ExpiCHO-S cells. After purification, 3 µg or 0.5 µg antibodies were loaded onto an SDS-PAGE gel after Expi293-F and ExpiCHO-S production and purification, respectively.

**Sequence S1: DNA sequence of the designed Durvalumab-2xeCMV insert.** The colour codes represent the following regions: SV40 polyA signal (grey), **CL Kappa** (cyan), **VL Durvalumab** (magenta), **Signal peptide** (brown), **Enh. MLP** (dark green), **TLP** (red), **CMV promoter** (yellow), **CMV Enhancer** (green), **Stuffer** (blue), **VH Durvalumab** (dark blue), **CH1-CH2-CH3** (black), **Stop codon** (dark yellow).

CGGCAGTGAAAAAATGCTTTATTTGTGAAATTTGTGATGCTATTGCTTTATTTGTAACCATTATAAGCTGCAATAAAC  
AAGTTAACAACAACAATTGCATTCATTTTATGTTTCAGGTTTCAGGGGAGGTGTGGGAGGTTTTTTAAAGCAAGTAAA  
ACCTCTACAAATGTGGTATGGCTGATTATGAGCTAGAGATCTA**TTA**ACACTCTCCCCTGTTGAAGCTCTTTGTGACGGG  
CGAGCTCAGGCCCTGATGGGTGACTTCGCAGGCGTAGACTTTGTGTTTCTCGTAGTCTGCTTTGCTCAGCGTCAGGGT  
GCTGCTGAGGCTGTAGGTGCTGTCCTTGCTGCTCTGTGACACTCTCCTGGGAGTTACCCGATTGGAGGGCGTT  
ATCCACCTTCCACTGTACTTTGGCCTCTCTGGGATAGAAGTTATTCAGCAGGCACACAACAGAGGCAGTTCAGATTTCC  
AACTGCTCATCAGATGGCGGGAAGATGAACACAGATGGTGCAGCCACAGTTCGTTTAATTTTCGACCTTAGTACCTTGG  
CCGAATGTCCAAGGGAGACTACCATATTGTTGACAGTAGTAGACTGCAAAATCTTCCGGTTCAGCCGGGAAATTGTA  
AGTGTAATACTGTGCCGAACCGCTTCCTGAAAACCTATCAGGTATGCCAGTAGCTCTAGAGGATGCGTCATAGATC  
AACAGACGCGGTGCTTGCCAGGCTTTTGTGATACCATGCAAGATATGAACTGGATACCTTTGTGAAGCTCTGCAA  
GACAGAGTTGCTCTTTACCCGGGGAGAGACTCAGGGTGCCGGGACTTTGGGTAAGCACTATTT**CAGCCAAGGCAAT**  
ATTAGTTAATCCCAACAATATTGTGAACAGGTAGGTAAAATGAGCGAAAGATAATGTCATGGTGGCTGCGACGCTAG  
AGATCCGTTTAACTTGGACCTGGGAGTGGACACCTGTGGAGAGAAAAGGCAAAGTGGATGTCATTGTCACTCAAGTG  
TATGGCCAGAT**CGGGCCAGGTGAATATCAAATCCTCCTCGTTTTTGAAACTGACAATCTTAGCGCAGAAGTAATGCC**  
**CGTTTTGAGAGGGAGTACTACCCCAACAGCTGG**ATCTCAAGCCTGCCACACCTCACCTCGACCATCCGCCGTCTAAA  
GACCGCCTACTTTAATTACATCATCAGCAGCACCTCCGCCAGAAACAACCCCGACCGCCACCCGCTGCCGCCGCCACG  
GTGCTCAGCCTA**CCTTGCGACTGTGACTGGTTAGACGCCTTCTCGAGAGGTTTTCCGATCCGGTCGATGCGGACTCG**  
**CTCAGGTCCCTCGGTGGCGGAGTACCGTTCGGAGGCCGACGGGTTTCCGATCCAAGAGTACTGGAAAGACCGCGAA**  
**GAGTTTGTCTCAACCGCAGGCCAACAGCTGGCCCTCGCAGACAGCGATGCGGAAGAGAGTGA**GGATCTGACGGTT  
CACTAAACG**AGCTCTGCTTATATAGACCTCCACCGTACACGCCTACCGCCATTTGCGTCAACGGGGCGGGGTTATTA**

CGACATTTTGGAAAGTCCCGTTGATTTTGGTGCCAAAACAAACTCCCATTGACGTCAATGGGGTGGAGACTTGGAAAT  
CCCCGTGAGTCAAACCGCTATCCACGCCCATTTGGTGTACTGCCAAAACCGCATCACCATGGTAATAGCGATGACTAAT  
ACGTAGATGTACTGCCAAGTAGGAAAGTCCCGTAAGGTCATGTACTGGGCATAATGCCAGGCGGGGCCATTTACCGTC  
ATTGACGTCAATAGGGGGCGGACTTGGCATATGATACACTTGATGTACTGCCAAGTGGGCAGTTTACCGTAAATACTC  
CACCCATTGACGTCAATGGAAAGTCCCTATTGGCGTTACTATGGGAACATACGTCAATTATTGACGTCAATGGGCGGGG  
GTCGTTGGGCGGTCAGCCAGGCGGGCCATTTACCGTAAGTTATGTAACGCGGAACTCCATATATGGGCTATGAACTA  
ATGACCCCGTAATTGATTACTATTAATAACTAGTCAATAATCAATGTCAACATGGCGGTCATATTGGACATGAGCCAAT  
ATAAATGTACCATCTAAAGTATATATGAGTAAACTTGGTCTGACAGTTACCAATGCTTAATCAGTGAGGCACCTATCTC  
AGCGATCTGTCTATTTTCGTTTCATCCATAGTTGCCTGACTCCCCGTCGTGTAGATAACTACGATACGGGAGGGCTTACCA  
TCTGGCCCCAGTGCTGCAATGATACCGCGAGATCCACGCTCACC GGCTGTACATTTATATTGGCTCATGTCCAATATGA  
CCGCCATGTTGACATTGATTATTGACTAGTTATTAATAGTAATCAATTACGGGGTCATTAGTTTCATAGCCCATATATGG  
AGTTCCGCGTTACATAACTTACGGTAAATGGCCCGCTGGCTGACCGCCCAACGACCCCGCCCATTTGACGTCAATAA  
TGACGTATGTTCCCATAGTAACGCCAATAGGGACTTTCCATTGACGTCAATGGGTGGAGTATTTACGGTAAACTGCCC  
ACTTGGCAGTACATCAAGTGTATCATATGCCAAGTCCGCCCCCTATTGACGTCAATGACGGTAAATGGCCCGCTGGC  
ATTATGCCCAGTACATGACCTTACGGGACTTTCTACTTGGCAGTACATCTACGTATTAGTCATCGCTATTACCATGTG  
ATGCGGTTTTGGCAGTACACCAATGGGCGTGGATAGCGGTTTTGACTCACGGGGATTTC AAGTCTCCACCCCATTGAC  
GTCAATGGGAGTTTGT TTTGGCACCAAAATCAACGGGACTTTCCAAAATGTCGTAATAACCCCGCCCCGTTGACGCAA  
ATGGGCGGTAGGCGTGTACGGTGGGAGGTCTATATAAGCAGAGCTCGTTTTAGTGAACCGTCAGATCCCACTCTCTTC  
CGCATCGCTGTCTGCGAGGGCCAGCTGTTGGGCTCGCGGTTGAGGACAAACTCTTCGCGGTCTTTCCAGTACTCTTGG  
ATCGGAAACCCGTCGGCTCCGAACGGTACTCCGCCACCGAGGGACCTGAGCGAGTCCGCATCGACCGGATCGGAAA  
ACCTCTCGAGAAAGGCGTCTAACCAGTCACAGTCGCAAGGTAGGCTGAGCACCGTGGCGGGCGGCAGCGGGTGGCG  
GTCGGGGTTGTTTCTGGCGGAGGTGCTGCTGATGATGTAATTAAAGTAGGCGGTCTTTAGACGGCGGATGGTCGAGG  
TGAGGTGTGGCAGGCTTGAGATCCAGCTGTTGGGGTGAGTACTCCCTCTCAAAGCGGGCATTACTTCTGCGCTAAG  
ATTGTCAGTTTCCAAAACGAGGAGGATTTGATATTCACCTGGCCGATCTGGCCATACACTTGAGTGACAATGACAT  
CCACTTTGCCTTTCTCTCCACAGGTGTCCACTCCCAGGTCCAAGTTAAACGGATCTCTAGCGCGCTTGCCACCATGACA  
TTATCTTTTCGCTCATTTTACCTACCTGTTCAACAATATTGTTGGGATTAACTAATATTGCCTTGGCAGAGGTTCAACTTGT  
GAAAGCGGCGGTGGTCTGGTCCAACCTGGTGGTTCTTTCGCGCTGAGTTGCGCCGCTAGTGGCTTCACTTTTAGTCGA  
TATTGGATGTCCTGGGTACGCCAAGCACCTGGCAAGGGCTTGAATGGGTGGCTAATATTAAGCAAGATGGATCAGA  
GAAATACTATGTCGACAGCGTAAAAGGGCGGTTTACTATTTCTAGGGACAACGCAAAGAACTCCCTGTACCTTCAAAT  
GAACTCTCTTCGCGCTGAGGACACTGCTGTGTACTACTGCGCCAGGGAGGGAGGTTGGTTCGGAGAACTGGCATTCTG  
ATTATTGGGGCCAGGGCACCCCTCGTTACAGTCTCAAGCGCCTCTACTAAAGGTCCATCTGTTTTTCCATTGGCTCCATCT  
TCTAAATCTACATCTGGTGGTACTGCTGCTTTGGGTTGTTTGGTTAAGGATTATTTCCAGAACCAGTCACCGTTTCTTG  
GAATTCTGGTGCTTTGACTTCTGGTGTTCACTTTTCCAGCCGATTGCAATCTTCTGGCTTGATTCTTTGTCTCTGT  
TGTTACTGTTCCCTCTTCTTTGGGTA CTCAAACCTACATCTGCAACGTTAACCATAAGCCATCTAACACCAAGGTTG  
ATAAGAGAGTCGAACCTAAGTCTTGTAAGACTCATACCTGTCCCCCTTGTCTGCCCCCTGAAGCCGCCGGCGGAC  
CTTCCGTGTTCTGTTCCCCCAAAGCCCAAGGATACCCTGATGATCAGCCGACCCCGAAGTGACCTGCGTGGTGG  
TGGATGTGTCCCACGAGGACCCTGAAGTGAAGTTCAATTGGTACGTGGACGGCGTGGAAGTGCAACAACGCCAAGACC  
AAGCCCAGAGAGGAACAGTACAACAGCACCTACCGGGTGGTGTCCGTGCTGACAGTGCTGCATCAGGACTGGCTGAA  
CGGCAAAGAGTACAAGTGCAAGGTGTCCAACAAGGCCCTGCCTGCCCCCATCGAGAAAACCATCAGCAAGGCCAAGG  
GCCAGCCCCGCGAACCCAGGTGTACACACTGCCTCCAGCAGGGACGAGCTGACCAAGAACCAGGTGTCCCTGACC  
TGTCTCGTGAAAGGCTTCTACCCCTCCGATATCGCCGTGGAATGGGAGAGCAATGGCCAGCCCGAGAACA ACTACAA  
GACCACCCCCCTGTGCTGGACAGCGACGGCTCATTTCTTCTGTACAGCAAGCTGACCGTGGACAAGTCCCGGTGGCA  
GCAGGGCAACGTGTTTCAGCTGCAGCGTGATGCACGAGGCCCTGCACAACCACTACACCCAGAAGTCCCTGAGCCTGA  
GCCCCGGCAAATAATGATCCAGAGGATCATAATCAGCCATACCACATTTGTAGAGGTTTTACTTGCTTTAAAAAACCTC  
CCACACCTCCCCCTGAACCTGAAACATAAAATGAATGCAATTGTTGTTGTTAACTTGTTTATTGCAGCTTATAATGGTTA  
CAAATAAAGCAATAGCATCACAAATTTACAAATAAAGCATTTTTTTCACTGCCCCGTGCGGTGGG
